# Supplementary material
Source: ML conference proceedings conference paper supplement (https://proceedings.neurips.cc/paper_files/paper/2023/hash/35fdecdf8861bc15110d48fbec3193cf-Abstract.html)
Supplement: Supplementary file 1 [file 35fdecdf8861bc15110d48fbec3193cf-Supplemental-Conference.zip]

Archive with 13 entries (13 files):
- Codes/DETCK.m
- Codes/DETCK_Ber.m
- Codes/invKL_ULCB.m
- Codes/KL_ULCB.m
- Codes/Rebuttal/Sim_Rebuttal_tune.m
- Codes/Rebuttal/Sim_Rebuttal_UCBvsLCB.m
- Codes/Sim_4Arm_Ber.m
- Codes/Sim_4Arm_Gaussian.m
- Codes/Sim_Ber.m
- Codes/Sim_Gaussian.m
- Codes/TAS.m
- Codes/TAS_Prob.m
- FastROBAI_Neurips23_Supp.pdf
